# Supplementary material for: Extract from Aronia melanocarpa L. Berries Protects Against Cadmium-induced Lipid Peroxidation and Oxidative Damage to Proteins and DNA in the Liver: A Study using a Rat Model of Environmental Human Exposure to this Xenobiotic
Source: MDPI journal article supplement (doi:10.3390/nu11040758), 2019-03-31
Supplement: s1 [file s1]

**Table S1.** The influence of the extract from *Aronia melanocarpa* L. berries (AE) on the concentration of cadmium (Cd) in the blood (µg/L), liver (µg/g), and urine (µg/g of creatinine) of female rats. <sup>1, 2, 3, 4</sup>

| Duration<br>(Months) | 1 mg Cd/kg Diet                                  |                      |                 | 5 mg Cd/kg Diet                                  |                      |                 |
|----------------------|--------------------------------------------------|----------------------|-----------------|--------------------------------------------------|----------------------|-----------------|
|                      | Cd Concentration<br>in the Cd <sub>1</sub> Group | Effect<br>of Cd + AE | Effect<br>of AE | Cd Concentration<br>in the Cd <sub>5</sub> Group | Effect<br>of Cd + AE | Effect<br>of AE |
| <b>Blood</b>         |                                                  |                      |                 |                                                  |                      |                 |
| <b>3</b>             | 0.1884 ± 0.0100*                                 | ↑ 2.7-fold           | ⇔               | 1.0236 ± 0.066***                                | ↑ 12-fold            | ↘ 19%           |
| <b>10</b>            | 0.1792 ± 0.0198*                                 | ↑ 2.1-fold           | ⇔               | 0.9394 ± 0.0439***                               | ↑ 9.2-fold           | ↘ 15%           |
| <b>17</b>            | 0.2425 ± 0.0167***                               | ↑ 3.2-fold           | ⇔               | 1.0339 ± 0.0266***                               | ↑ 12.5-fold          | ↘ 10%           |
| <b>24</b>            | 0.2330 ± 0.0143**                                | ↑ 2.6-fold           | ⇔               | 1.0467 ± 0.0508***                               | ↑ 10.2-fold          | ↘ 11%           |
| <b>Liver</b>         |                                                  |                      |                 |                                                  |                      |                 |
| <b>3</b>             | 0.1447 ± 0.0093***                               | ↑ 2.8-fold           | ↘ 33%           | 0.912 ± 0.053***                                 | ↑ 21-fold            | ↘ 18%           |
| <b>10</b>            | 0.199 ± 0.028***                                 | ↑ 7.8-fold           | ⇔               | 1.617 ± 0.112***                                 | ↑ 62-fold            | ↘ 11%           |
| <b>17</b>            | 0.211 ± 0.019***                                 | ↑ 14-fold            | ⇔               | 2.449 ± 0.178***                                 | ↑ 134-fold           | ↘ 24%           |
| <b>24</b>            | 0.364 ± 0.025***                                 | ↑ 17-fold            | ↘ 37%           | 2.755 ± 0.089***                                 | ↑ 182-fold           | ↘ 10%           |
| <b>Urine</b>         |                                                  |                      |                 |                                                  |                      |                 |
| <b>3</b>             | 0.2184 ± 0.0081**                                | ↑ 58%                | ⇔               | 0.5008 ± 0.0234***                               | ↑ 4.4-fold           | ↘ 21%           |
| <b>10</b>            | 0.1809 ± 0.0194**                                | ↑ 47%                | ⇔               | 0.4002 ± 0.0480***                               | ↑ 3.8-fold           | ↘ 25%           |
| <b>17</b>            | 0.2096 ± 0.0215*                                 | ↑ 44%                | ⇔               | 0.4147 ± 0.0390***                               | ↑ 3.9%               | ↘ 33%           |
| <b>24</b>            | 0.2053 ± 0.0155*                                 | ↑ 56%                | ⇔               | 0.4104 ± 0.0198***                               | ↑ 3.7-fold           | ↘ 22%           |

<sup>1</sup> The rats were given 0.1% aqueous AE and Cd in diet at the concentration of 1 or 5 mg/kg for 3–24 months. <sup>2</sup> Table presents Cd concentration and changes in its concentration ( $p < 0.05$ ; ANOVA, Duncan's multiple range post hoc test) compared to the control group (\* $p < 0.05$ , \*\* $p < 0.01$ , \*\*\* $p < 0.001$ ): a percentage or factor of increase (↑) and the appropriate group treated with Cd alone: a percentage increase (↗), decrease (↘), or lack of statistically significant change (⇔;  $p > 0.05$ ) are indicated. Cd concentration in control groups (mean ± SE) ranged from  $0.0691 \pm 0.0079$  to  $0.0860 \pm 0.0091$  µg/L in the blood,  $0.0137 \pm 0.0015$  to  $0.0348 \pm 0.0026$  µg/g in the liver, and from  $0.1304 \pm 0.0080$  to  $0.1491 \pm 0.0103$  µg/g of creatinine in the urine. <sup>3</sup> Detailed data on the impact of AE on the concentration of Cd in the blood, liver, and urine of rats exposed to this heavy metal have already been published [17]. <sup>4</sup> The concentrations of Cd in the blood and urine (biomarkers of intoxication with this xenobiotic) of the rats exposed to the 1 mg Cd/kg diet (0.103–0.324 µg/L and 0.085–0.354 µg/g creatinine, respectively) and 5 mg Cd/kg diet (0.584–1.332 µg/L and 0.284–0.820 µg/g creatinine, respectively), alone or together with AE [17] were within the range of this metal concentrations noted in the blood and urine of the general population in industrialized and developing countries [5,9,10].

**Table S2.** The influence of the extract from *Aronia melanocarpa* L. berries (AE) on total antioxidative status (TAS), total oxidative status (TOS), oxidative stress index (OSI), and the concentration of hydrogen peroxide (H<sub>2</sub>O<sub>2</sub>) in the liver of female rats exposed to cadmium (Cd). <sup>1,2</sup>

| Duration<br>(Months)              | 1 mg Cd/kg Diet       |                      |                 | 5 mg Cd/kg Diet       |                      |                 |
|-----------------------------------|-----------------------|----------------------|-----------------|-----------------------|----------------------|-----------------|
|                                   | Effect<br>of Cd Alone | Effect<br>of Cd + AE | Effect<br>of AE | Effect<br>of Cd Alone | Effect<br>of Cd + AE | Effect<br>of AE |
| <b>TAS</b>                        |                       |                      |                 |                       |                      |                 |
| <b>3</b>                          | ↔                     | ↔                    | ↔               | ↔                     | ↔                    | ↔               |
| <b>10</b>                         | ↓ 28%                 | ↓ 30%                | ↔               | ↓ 19%                 | ↔                    | ↔               |
| <b>17</b>                         | ↓ 46%                 | ↓ 31%                | ↔               | ↔                     | ↔                    | ↔               |
| <b>24</b>                         | ↔                     | ↑ 18%                | ↗ 36%           | ↔                     | ↑ 43%                | ↗ 54%           |
| <b>TOS</b>                        |                       |                      |                 |                       |                      |                 |
| <b>3</b>                          | ↔                     | ↔                    | ↔               | ↔                     | ↔                    | ↔               |
| <b>10</b>                         | ↔                     | ↓ 38%                | ↘ 40%           | ↔                     | ↔                    | ↘ 19%           |
| <b>17</b>                         | ↔                     | ↓ 29%                | ↘ 32%           | ↔                     | ↔                    | ↘ 20%           |
| <b>24</b>                         | ↔                     | ↔                    | ↔               | ↑ 51%                 | ↑ 36%                | ↘ 14%           |
| <b>OSI</b>                        |                       |                      |                 |                       |                      |                 |
| <b>3</b>                          | ↔                     | ↔                    | ↔               | ↑ 17%                 | ↔                    | ↘ 14%           |
| <b>10</b>                         | ↑ 43%                 | ↔                    | ↘ 38%           | ↑ 30%                 | ↔                    | ↘ 26%           |
| <b>17</b>                         | ↑ 92%                 | ↔                    | ↘ 48%           | ↑ 21%                 | ↔                    | ↘ 26%           |
| <b>24</b>                         | ↔                     | ↓ 23%                | ↘ 24%           | ↑ 61%                 | ↔                    | ↘ 41%           |
| <b>H<sub>2</sub>O<sub>2</sub></b> |                       |                      |                 |                       |                      |                 |
| <b>3</b>                          | ↔                     | ↓ 33%                | ↘ 38%           | ↔                     | ↔                    | ↘ 24%           |
| <b>10</b>                         | ↑ 75%                 | ↔                    | ↘ 47%           | ↑ 73%                 | ↔                    | ↘ 37%           |
| <b>17</b>                         | ↑ 3.2-fold            | ↔                    | ↘ 4.7-fold      | ↑ 3.4-fold            | ↔                    | ↘ 4.8-fold      |
| <b>24</b>                         | ↑ 2.8-fold            | ↔                    | ↘ 2.8-fold      | ↑ 2.9-fold            | ↔                    | ↘ 3.1-fold      |

<sup>1</sup> The rats were given 0.1% aqueous AE and Cd in diet at the concentration of 1 or 5 mg/kg for 3–24 months. <sup>2</sup> Table presents changes in Cd concentration ( $p < 0.05$ ; ANOVA, Duncan's multiple range post hoc test) compared to the control group: a percentage or factor of increase (↑), decrease (↓), or lack of statistically significant change (↔;  $p > 0.05$ ) and appropriate group treated with Cd alone: a percentage increase (↗), decrease (↘) or lack of statistically significant change (↔;  $p > 0.05$ ) are indicated.

**Table S3.** The influence of the extract from *Aronia melanocarpa* L. berries (AE) on the concentration of metallothionein (MT) (nmol/g) in the liver of female rats. <sup>1, 2, 3</sup>

| Duration<br>(Months) | 1 mg Cd/kg Diet                                     |                      |                 | 5 mg Cd/kg Diet                                     |                      |                 |
|----------------------|-----------------------------------------------------|----------------------|-----------------|-----------------------------------------------------|----------------------|-----------------|
|                      | MT<br>Concentration<br>in the Cd <sub>1</sub> Group | Effect<br>of Cd + AE | Effect<br>of AE | MT<br>Concentration<br>in the Cd <sub>5</sub> Group | Effect<br>of Cd + AE | Effect<br>of AE |
| 3                    | 51.96 ± 17.43***                                    | ↔                    | ↘ 48%           | 59.83 ± 17.74***                                    | ↔                    | ↘ 50%           |
| 10                   | 55.75 ± 15.22***                                    | ↔                    | ↘ 60%           | 62.07 ± 14.21***                                    | ↔                    | ↘ 44%           |
| 17                   | 61.77 ± 14.09***                                    | ↑ 27%                | ↘ 41%           | 69.96 ± 8.855***                                    | ↔                    | ↘ 61%           |
| 24                   | 63.40 ± 24.62***                                    | ↔                    | ↘ 43%           | 79.85 ± 15.93***                                    | ↔                    | ↘ 65%           |

<sup>1</sup> The rats were given 0.1% aqueous AE and Cd in diet at the concentration of 1 or 5 mg/kg for 3–24 months. <sup>2</sup> Table presents MT concentration and changes in its concentration ( $p < 0.05$ ; ANOVA, Duncan's multiple range post hoc test) compared to the control group (\*\* $p < 0.001$ ): a percentage of increase (↑) or lack of statistically significant change (↔;  $p > 0.05$ ) and the appropriate group treated with Cd alone: a percentage of decrease (↘) are indicated. MT concentration in the liver in the control group (mean ± SE) ranged from 23.90 ± 9.079 to 30.22 ± 11.81 nmol/g. <sup>3</sup> Detailed data on the impact of Cd and AE on the concentration of MT in the liver of rats exposed to this heavy metal have already been published [13].
